1  
2 **Step-wise evolution of temperature-mediated phenotypic plasticity in eyespot**  
3 **size across nymphalid butterflies**  
4

5 **Authors**

6 Shivam Bhardwaj<sup>1,\*</sup>, Lim Si-Hui Jolander<sup>2</sup>, Markus R. Wenk<sup>1,2</sup>, Jeffrey C. Oliver<sup>3</sup>, H. Frederik Nijhout<sup>4</sup> and Antónia  
7 Monteiro<sup>1,5,\*</sup>

- 8 1) Department of Biological Sciences, National University of Singapore, Singapore  
9 2) Department of Biochemistry, National University of Singapore, Singapore  
10 3) Office of Digital Innovation & Stewardship, University of Arizona, Tucson, AZ, USA  
11 4) Department of Biology, Duke University, Durham, NC, USA  
12 5) Yale-NUS College, Singapore  
13 \*) Corresponding authors  
14  
15

16 **Abstract**

17 There are two disparate views regarding phenotypic plasticity. One regards plasticity  
18 as a derived adaptation to help organisms survive in variable environments<sup>1,2</sup> while the  
19 other views plasticity as the outcome of flexible, non-canalized, developmental  
20 processes, ancestrally present in most organisms, that helps them colonize or adapt to  
21 novel environments<sup>3-5</sup> e.g., a pre-adaptation. Both views of plasticity currently lack a  
22 rigorous, mechanistic examination of ancestral and derived states and direction of  
23 change<sup>2</sup>. Here we show that the origin of phenotypic plasticity in eyespot size in  
24 response to environmental temperature observed in *Bicyclus anynana* butterflies is a  
25 derived adaptation of this lineage. Eyespot size is regulated by temperature-mediated  
26 changes in levels of a steroid hormone, 20E, that affects proliferation of eyespot  
27 central cells expressing the 20E receptor (EcR)<sup>6,7</sup>. By estimating the origin of the  
28 known physiological and molecular components of eyespot size plasticity in a  
29 comparative framework, we showed that 20E titer plasticity in response to  
30 temperature is a pre-adaptation shared by all butterfly species examined, whereas the

31 origin of expression of EcR in eyespot centers, and the origin of eyespot sensitivity to  
32 the hormone-receptor complex are both derived traits found only in a subset of  
33 species with eyespots. The presence of all three molecular components required to  
34 produce a plastic response is only observed in *B. anynana*. This gradual, step-wise,  
35 physiological/molecular response to temperature is a likely adaptation to temperature  
36 variation experienced across wet and dry seasons in the habitat of this species. This  
37 work supports, thus, the first view of plasticity as a derived adaptation.

38

39 The two views on phenotypic plasticity articulated above, as an adaptation or a pre-  
40 adaptation, require either that plasticity evolves under natural selection or that it is  
41 ancestral and widespread and facilitates adaptation. Several case studies have been  
42 documented in support of the first<sup>8-10</sup>, and second evolutionary scenarios<sup>11,12</sup> but to  
43 date, almost nothing is known about how the original plastic responses underlying  
44 both hypotheses originated and evolved at the proximate, mechanistic level. Details of  
45 how plasticity originates, and whether or not it is widespread and ancestral to a group  
46 of species, regardless of their current living environments, may also help discriminate  
47 between plasticity being a facilitator or a consequence of organismal adaptation.

48

49 A comparative approach that addresses the mechanistic origins of plasticity needs  
50 grounding in a sufficiently well understood molecular mechanism of plasticity. Here  
51 we use dramatic seasonal variation in the size of *B. anynana* wing eyespot patterns as  
52 our case study. *Bicyclus* species live throughout dry and wet seasons in Africa, where  
53 eyespots of different sizes serve different ecological roles<sup>13,14</sup>. In the hot wet season,  
54 the large exposed ventral eyespots help deflect attacks of invertebrate predators  
55 towards the wing margins<sup>15</sup>, whereas in the cool dry season the smaller eyespots help  
56 in camouflage against vertebrate predation<sup>16</sup>.

57 Eyespot size plasticity in *B. anynana* is mostly controlled by temperature, which leads  
58 to variable titers of the hormone 20-hydroxyecdysone (20E) at the wandering (Wr)  
59 stage of larval development<sup>6</sup>. Manipulations of 20E signaling alone, at that time in  
60 development, are sufficient to modify eyespot size<sup>6</sup>. Upon sufficient 20E signaling,  
61 these central cells divide and produce a larger central group of signaling cells<sup>7</sup> and  
62 ultimately a larger eyespot. Given knowledge of how eyespot size plasticity functions  
63 in one species, we sought to investigate how this system of temperature sensitivity  
64 evolved by performing a comparative study across nymphalid butterflies, with and  
65 without eyespots.

66

67 Eyespots originated once within the nymphalid family, about 85 mya, likely from pre-  
68 existing simple spots of a single colour<sup>17,18</sup> but it is unclear whether size plasticity in  
69 response to temperature evolved before or after the origin of eyespots. If eyespot or  
70 spot size plasticity is an ancestral pre-adaptation, it is possible that even species of  
71 butterflies that do not experience seasonal environments (such as those living near the  
72 equator), might have the ability to develop different eyespot or spot sizes when reared  
73 at different temperatures under experimental conditions. Alternatively, if eyespot size  
74 plasticity is an evolved adaptation, used exclusively by species living in seasonal  
75 environments, then only these species should exhibit plasticity.

76

77 To test these hypotheses, we reared twelve species from different nymphalid sub-  
78 families, and from tropical, or sub-tropical regions, plus one outgroup papilionid  
79 species (Table S1) at two different temperatures, separated by 10 degrees Celsius, and  
80 measured eyespot size plasticity in adult females. Three different types of reaction  
81 norm to rearing temperature were observed across species (Fig. 1A). Five species  
82 showed no significant difference in hindwing (HW) Cu1 eyespot size when reared  
83 across two temperatures and were deemed not plastic. Most species showed a

84 decrease in eyespot size with an increase in temperature and had a negative slope in  
85 their reaction norms. *B. anynana* was the only species which displayed a positive slope  
86 in its reaction norm, where eyespot size increased with temperature<sup>13</sup> (Table S2).  
87 Ancestral character state reconstructions for the slope of these reaction norms  
88 suggested that eyespot size plasticity of any form is a derived trait within nymphalids,  
89 with three or four possible independent origins. Ancestral species of nymphalids  
90 lacked plasticity, whereas there were two or three independent origins of a negative  
91 response of eyespot size to increasing temperature and a separate origin of the  
92 opposing pattern of plasticity in ventral HW eyespot size in the lineage leading to *B.*  
93 *anynana* (Fig. 1B).

94  
95 To investigate the molecular basis for these different patterns of plasticity we looked  
96 at 20E titers and EcR expression across species using female data. 20E titers at the Wr  
97 stage were consistently higher at the higher rearing temperature across all butterflies  
98 (Fig. 2a) (Table S3), suggesting that 20E titer plasticity in response to temperature is  
99 an ancestral trait shared across these butterflies. EcR expression at the Wr stage was  
100 absent from spot centers in species with simple spots, but was present in the eyespot  
101 central cells across all species investigated, with a few exceptions (*Junonia coenia* and  
102 *Junonia almana*) (Fig. 2B). This suggests that EcR localization in eyespots is a derived  
103 trait, present only in species with eyespots.

104  
105 Finally, to test whether eyespots expressing EcR are size regulated by 20E we  
106 manipulated 20E levels and EcR receptors directly. Functional experiments were  
107 performed in four species of butterflies from different Nymphalid subfamilies, *Idea*  
108 *leuconoe* (Danainae), a control outgroup danainae with no EcR expression in its black  
109 spots, *Vindula dejone* (Nymphalinae), *Doleschallia bisaltide* (Nymphalinae), and *B. anynana*  
110 (Satyrinae), the latter three displaying EcR expression in their eyespot centers. Our  
111 prediction would be that *Idea* should not respond to 20E signaling at all, given the lack

112 of the receptor in its spots, and that increases in 20E signaling at low temperature  
113 might cause the eyespots of *Vindula* and *Doleschalia* to become smaller but those of *B.*  
114 *anymana* to become larger, whereas decreases of 20E signaling at high temperature  
115 might cause the eyespots of the first two species to become larger but smaller in *B.*  
116 *anymana*. Injections of 20E into female wanderers reared at low temperature (and with  
117 lower 20E titers) and of an EcR antagonist, CucB, into female wanderers reared at  
118 high temperature (and with higher 20E titers), showed no response across the first  
119 three species, whereas eyespot size significantly increased with 20E injections and  
120 decreased with antagonist injections in *B. anymana* (Fig. 3). These data indicate that  
121 only the eyespots of *B. anymana* are sensitive to 20E signaling, within the natural range  
122 of titers displayed by these species. This sensitivity is a derived trait potentially  
123 restricted to the satyrid sub-family within nymphalids (Fig. 4).

124

125 While multiple reports have focused on the role of hormones as mediators of trait  
126 plasticity<sup>19-22</sup>, the physiological and developmental details of how a fully functional  
127 plastic trait originates during the course of evolution were still obscure. Here we  
128 identified the approximate evolutionary origins of individual components of a plastic  
129 response of eyespot size in response to temperature and discovered this plastic  
130 response to be a complex trait that evolved gradually via changes to different  
131 molecular components. Our work showed that the origin of plasticity in hormone  
132 titers, the origin of hormone receptor expression in the trait, and the origin of eyespot  
133 sensitivity to these hormones all took place at different stages of nymphalid  
134 diversification (Fig. 4).

135

136 An increase in eyespot size in response to temperature appears to be restricted to  
137 satyrid butterflies, and is a derived response within nymphalids. Plasticity in eyespot  
138 size in butterflies had been primarily documented in satyrid butterflies such as

139 *Melanitis leda* and several *Bicyclus* species<sup>23-25</sup> where size was always found to positively  
140 increase with rearing temperature. Most of the reared species of nymphalids and the  
141 papilionid species showed a slight decrease in eyespot/spot size with an increase in  
142 temperature, while some species showed no plasticity at all. This decrease in eyespot  
143 size with increasing temperature may simply reflect non-adaptive variation from a  
144 poorly canalized system. In addition, satyrid butterflies, but none of the other species,  
145 used the 20E asymmetry to regulate the size of their eyespots in a novel way. This was  
146 enabled by the prior recruitment of EcR to the eyespot central cells perhaps  
147 concurrently with eyespot origins (Fig. 4). These central signaling cells play an  
148 important role in determining eyespot size at the Wr stages of development<sup>26</sup>. Some  
149 species, such as *Junonia coenia*, retain expression of EcR in eyespots but only at other  
150 stages of wing development<sup>27</sup>. Finally, the active 20E-EcR complexes increase eyespot  
151 size in *B. anynana* but not in other species with similar EcR expression in their eyespot  
152 centers. The ability of 20E to promote localized patterns of cell division might have  
153 evolved in the lineage leading to *B. anynana* alone<sup>7</sup>.

154  
155 Eyespot size plasticity in connection with wet and dry seasonal forms is widely  
156 conserved across the sub-family Nymphalinae<sup>28</sup> but our results suggest that different  
157 mechanisms may have evolved to regulate eyespot size plasticity in these lineages. Our  
158 controlled rearing experiments showed that all nymphalinae (*Vanessa cardui*, *Junonia*  
159 *almana*, *J. coenia*, *J. atlites*, *J. iphita* and *Doleschallia bisaltide*) produced only small changes  
160 in the size of the their Cu1 eyespots in response to rearing temperature, and these  
161 were in the opposite direction to those observed in *B. anynana*. Other environmental  
162 factors might cue and regulate these species' seasonal morphs (Fig. S2), perhaps cues  
163 that better predict the arrival of the seasons where these butterflies have evolved.  
164 Investigations at the proximate level will be required to correctly establish the  
165 environmental cues that induce seasonal forms in these other butterfly species. For

166 now, we uncover phenotypic plasticity in eyespot size in *B. anynana* as a complex, step-  
167 wise adaptation to seasonal environments cued by temperature that required very  
168 specific mutations to originate. This work also serves as a warning that if all forms of  
169 plasticity are as specific and hard to evolve as the one documented in *B. anynana*, these  
170 exquisite adaptations to specific predictable fluctuating environments may in fact, lend  
171 the species vulnerable to extinction under unpredictable climate change, as previously  
172 noted <sup>29</sup>.

173

## 174 **Figure legends**

175

176 **Figure 1. Eyespot/spot size plasticity is widespread across butterfly lineages**  
177 **but the response to rearing temperature has different norms of reaction across**  
178 **species.** A. Size of hindwing ventral Cu1 eyespots (arrowheads). Thirteen species of  
179 butterflies were reared at two different rearing temperatures. Eyespot size corrected  
180 for wing size is plotted for two different temperatures (low temperature 17°C or 20°C  
181 is marked with blue symbols, while high temperature of 27°C or 30°C is marked with  
182 red symbols). Error bars represent 95% CI of means. B. Phylogenetic analysis  
183 suggests 3 independent origins for two different patterns of plasticity (eyespot size  
184 decreases with increasing temperatures: red lineages, and eyespot size increases with  
185 increasing temperature: green lineage). The ancestral reconstruction for the gain of  
186 negative plasticity is equivocal for two (shown) or three (not shown) gains. That is, it  
187 is equally parsimonious that negative plasticity was gained as shown or that it was  
188 gained three separate times: once leading to *I. leucone*, once leading to *V. dejone*, and  
189 once leading to the MRCA of *V. cardui* and *D. bisaltide*.

190

191

192 **Figure 2. 20E titers increase with rearing temperature across most species but**  
193 **EcR expression in eyespots is only found in a subset of nymphalids.** A. 20E  
194 titers increase with an increase in rearing temperature across most species. This trait is  
195 ancestral in nature, with a likely origin before the origin of eyespots. B. EcR is absent  
196 in simple spots, but present in the future eyespot centers of most of the species  
197 investigated (N ≥ 3 for each immunostaining).

198



199 **Fig. 3. Sensitivity of eyespots to EcR mediated signaling originated in the**  
200 **lineage leading to *B. anynana* butterflies.** Four species of butterflies were injected  
201 with 20E hormones or EcR antagonists (CucB) during the Wr stage. While *Idea*  
202 *leuconoe*, *Vindula dejone* and *Doleschallia bisaltide* are not sensitive to either of the hormone  
203 signal manipulations, *B. anynana* shows sensitivity towards both 20E and CucB. Error  
204 bars represent 95% CI of means. Significant differences between treatments are  
205 represented by asterisks: \*\*,  $p < 0.01$ , \*\*\*,  $p < 0.001$ .

206  
207 **Fig. 4. Phenotypic plasticity as a complex trait originated gradually.**  
208 Phylogenetic analysis suggests three or four independent origins for two different  
209 patterns of plasticity (eyespot size decreases with increasing temperatures: red lineages  
210 and - sign, and eyespot size increases with increasing temperature: green lineage and  
211 + sign). Green circles (character state 1) represents high 20E titers with increasing  
212 temperature, while white circles (character state 0) represent no significant difference  
213 in titers at two developmental temperatures. Green squares represent presence of EcR  
214 in eyespots, while white squares represent its absence. EcR expression in eyespots is  
215 inferred to have originated concurrently with the origin of eyespots, about 85 Mya,  
216 and subsequently lost in a few nymphalid lineages. Green triangles represent  
217 sensitivity towards 20E in respective species (character state 1), while white triangles  
218 represent absence of sensitivity (character state 0). Gray circles, squares and triangles  
219 represent missing data points. Alternative models using Maximum Likelihood reach  
220 similar conclusions (Supplementary Information).

221  
222  
223



224  
225  
226

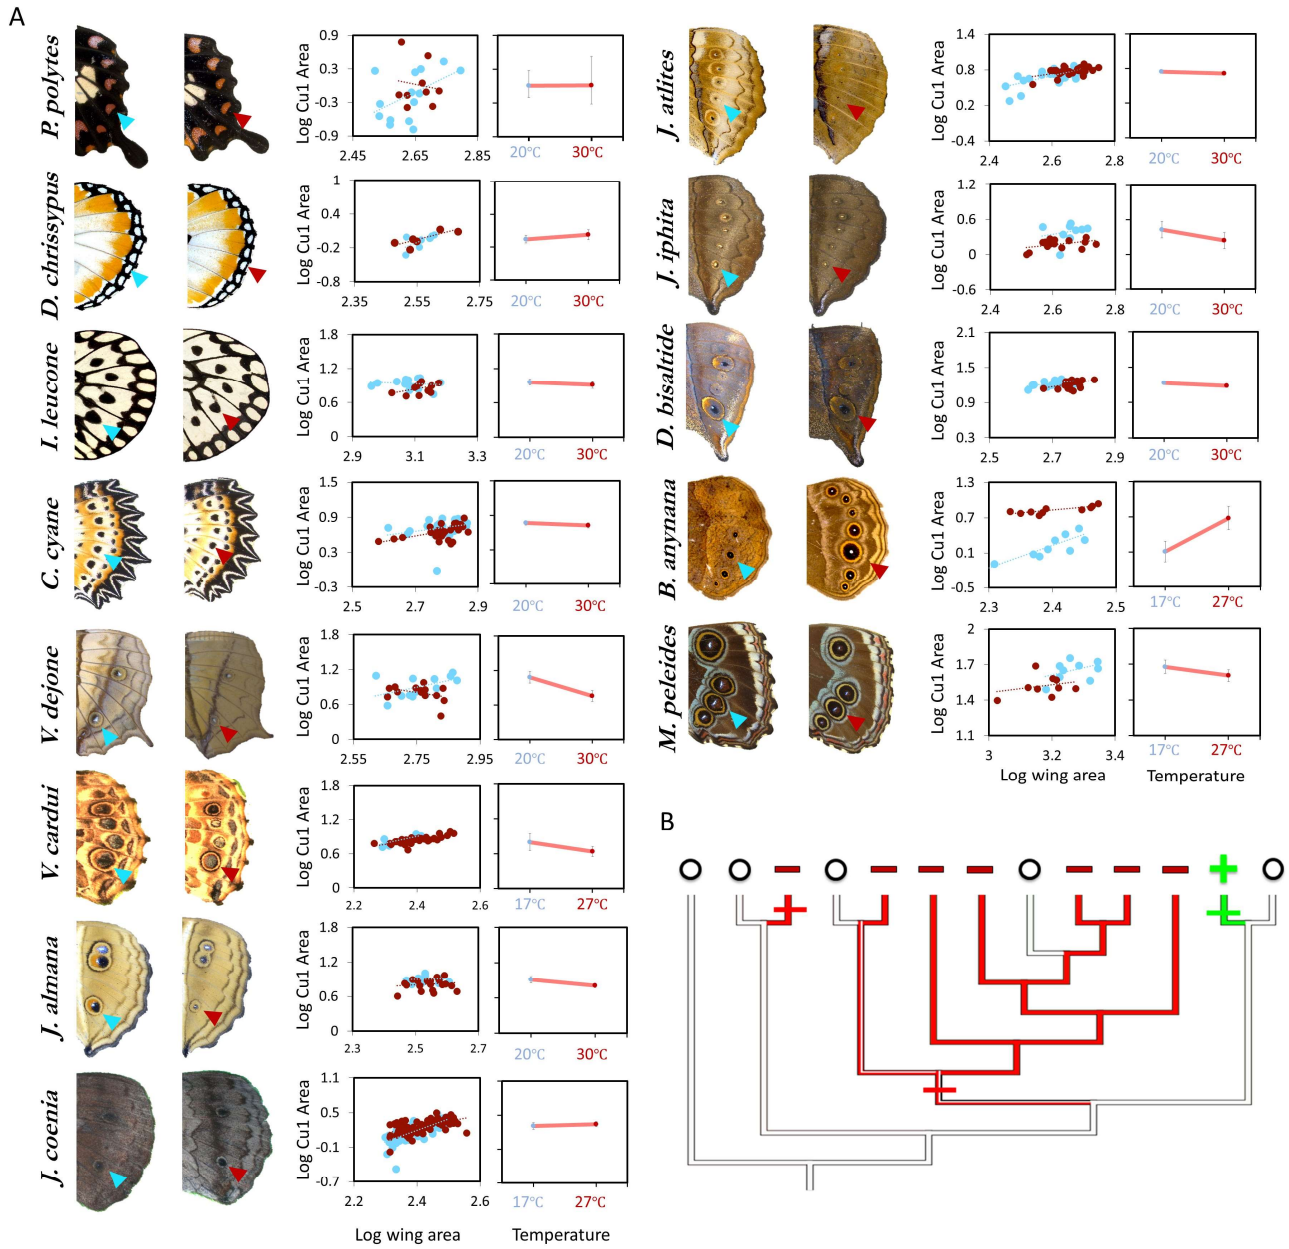

227  
228

229 **Figure 2**  
230  
231

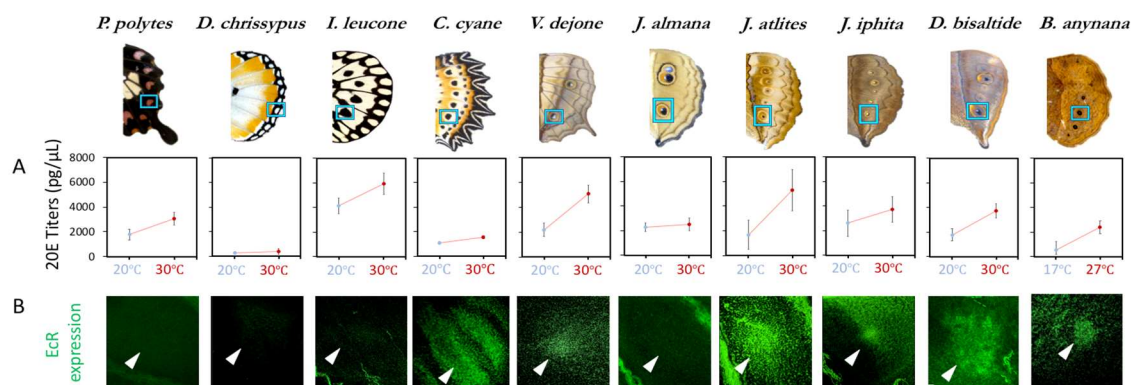

232  
233  
234

235 **Figure 3**  
236

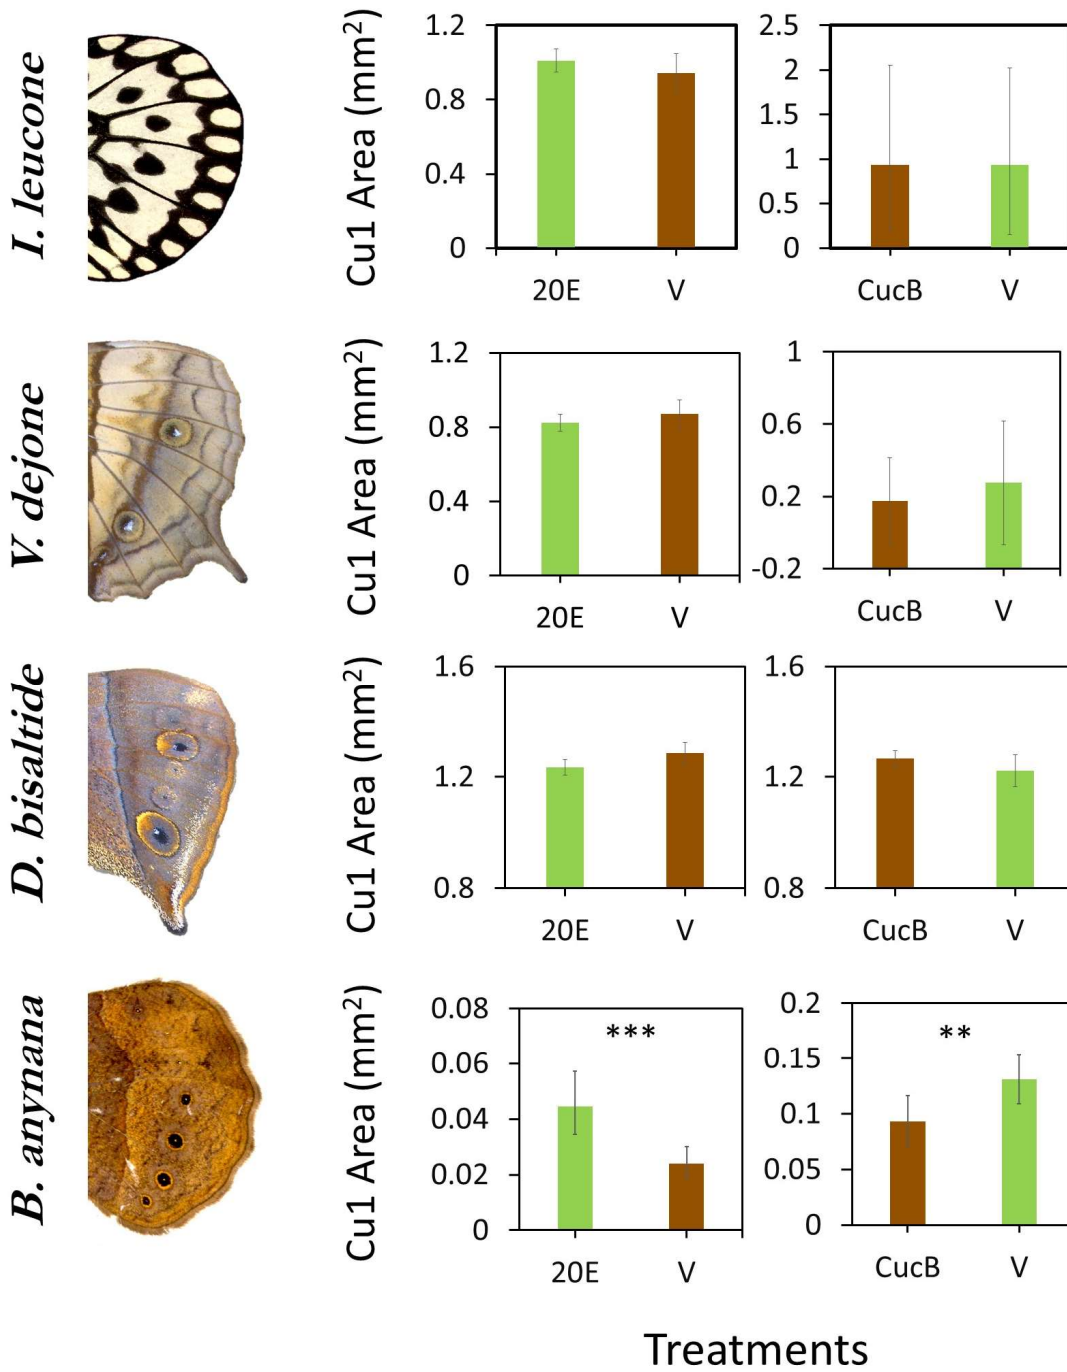

237  
238  
239

240 **Figure 4**  
 241  
 242

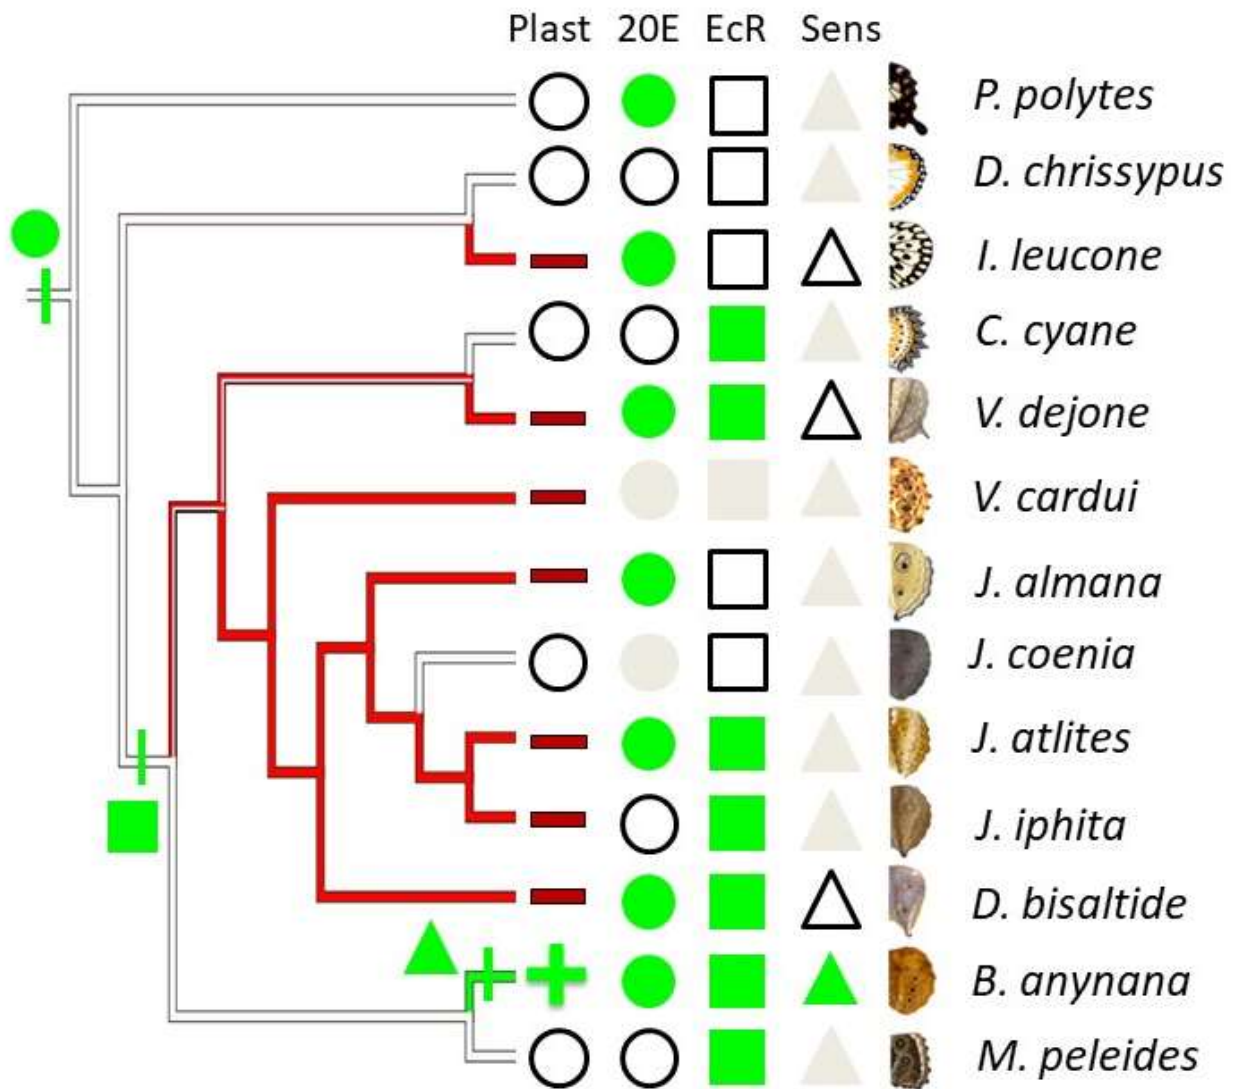

243  
 244

## References

- 245  
246
- 247 1 de Jong, G. Evolution of phenotypic plasticity: patterns of plasticity and the emergence of  
248 ecotypes. *New Phytol* **166**, 101-117, doi:10.1111/j.1469-8137.2005.01322.x (2005).
- 249 2 Bradshaw, A. D. in *Advances in Genetics* Vol. 13 (eds E. W. Caspari & J. M. Thoday) 115-155  
250 (Academic Press, 1965).
- 251 3 Pigliucci, M. Evolution of phenotypic plasticity: where are we going now? *Trends in ecology &*  
252 *evolution* **20**, 481-486, doi:<https://doi.org/10.1016/j.tree.2005.06.001> (2005).
- 253 4 Laland, K. *et al.* Does evolutionary theory need a rethink? *Nature* **514**, 161-164,  
254 doi:10.1038/514161a. (2014).
- 255 5 West-Eberhard, M. J. *Developmental Plasticity and Evolution*. (Oxford University Press, 2003).
- 256 6 Monteiro, A. *et al.* Differential Expression of Ecdysone Receptor Leads to Variation in  
257 Phenotypic Plasticity across Serial Homologs. *PLoS Genet* **11**, e1005529,  
258 doi:10.1371/journal.pgen.1005529 (2015).
- 259 7 Bhardwaj, S. *et al.* Sex differences in 20-hydroxyecdysone hormone levels control sexual  
260 dimorphism in *Bicyclus anynana* wing patterns. *Molecular biology and evolution*,  
261 doi:10.1093/molbev/msx301 (2017).
- 262 8 Matthew A. Wund, John A. Baker, Brendan Clancy, Justin L. Golub & Susan A. Foster. A  
263 Test of the “Flexible Stem” Model of Evolution: Ancestral Plasticity, Genetic  
264 Accommodation, and Morphological Divergence in the Threespine Stickleback Radiation.  
265 *The American Naturalist* **172**, 449-462, doi:10.1086/590966 (2008).
- 266 9 Standen, E. M., Du, T. Y. & Larsson, H. C. E. Developmental plasticity and the origin of  
267 tetrapods. *Nature* **513**, 54, doi:10.1038/nature13708 (2014).
- 268 10 Moran, N. A. The Evolutionary Maintenance of Alternative Phenotypes. *The American*  
269 *Naturalist* **139**, 971-989 (1992).

- 270 11 Hiyama, A., Taira, W. & Otaki, J. M. Color-Pattern Evolution in Response to Environmental  
271 Stress in Butterflies. *Frontiers in genetics* **3**, 15, doi:10.3389/fgene.2012.00015 (2012).
- 272 12 Kiontke, K. & Fitch, D. H. A. Phenotypic Plasticity: Different Teeth for Different Feasts.  
273 *Current Biology* **20**, R710-R712, doi:10.1016/j.cub.2010.07.009 (2010).
- 274 13 Brakefield, P. M. & Reitsma, N. Phenotypic plasticity, seasonal climate and the population  
275 biology of *Bicyclus* butterflies (Satyridae) in Malawi. *Ecological Entomology* **16**, 291-303,  
276 doi:10.1111/j.1365-2311.1991.tb00220.x (1991).
- 277 14 Brakefield, P. M. *et al.* Development, plasticity and evolution of butterfly eyespot patterns.  
278 *Nature* **384**, 236-242, doi:10.1038/384236a0 (1996).
- 279 15 Prudic, K. L., Stoehr, A. M., Wasik, B. R. & Monteiro, A. Eyespots deflect predator attack  
280 increasing fitness and promoting the evolution of phenotypic plasticity. *Proc Biol Sci* **282**,  
281 20141531, doi:10.1098/rspb.2014.1531 (2015).
- 282 16 Lyytinen, A., Brakefield, P. M., Lindström, L. & Mappes, J. Does predation maintain eyespot  
283 plasticity in *Bicyclus anynana*? *Proceedings of the Royal Society B: Biological Sciences* **271**, 279-283  
284 (2004).
- 285 17 Oliver, J. C., Tong, X. L., Gall, L. F., Piel, W. H. & Monteiro, A. A single origin for  
286 nymphalid butterfly eyespots followed by widespread loss of associated gene expression.  
287 *PLoS Genet* **8**, e1002893, doi:10.1371/journal.pgen.1002893 (2012).
- 288 18 Oliver, J. C., Beaulieu, J. M., Gall, L. F., Piel, W. H. & Monteiro, A. Nymphalid eyespot serial  
289 homologues originate as a few individualized modules. *Proceedings of the Royal Society B:*  
290 *Biological Sciences* **281**, doi:10.1098/rspb.2013.3262 (2014).
- 291 19 Dai, H., Wu, X., & Wu, S. The change of juvenile hormone titer and its relation with wing  
292 dimorphism of brown planthopper, *Nilaparvata lugens*. *Acta Entom. Sin.* **44**, 27-32 (2001).
- 293 20 Emlen, D. J. & Nijhout, H. F. Hormonal control of male horn length dimorphism in the  
294 dung beetle *Onthophagus taurus* (Coleoptera: Scarabaeidae). *J Insect Physiol* **45**, 45-53 (1999).



- 295 21 Gotoh, H. *et al.* Juvenile Hormone Regulates Extreme Mandible Growth in Male Stag  
296 Beetles. *PLOS ONE* **6**, e21139, doi:10.1371/journal.pone.0021139 (2011).
- 297 22 Gotoh, H. *et al.* Developmental link between sex and nutrition; doublesex regulates sex-  
298 specific mandible growth via juvenile hormone signaling in stag beetles. *PLoS Genet* **10**,  
299 e1004098, doi:10.1371/journal.pgen.1004098 (2014).
- 300 23 Brakefield, P. M. Tropical dry and wet season polyphenism in the butterfly *Melanitis leda*  
301 (Satyridae): Phenotypic plasticity and climatic correlates. *Biological Journal of the Linnean Society*  
302 **31**, 175-191, doi:10.1111/j.1095-8312.1987.tb01988.x (1987).
- 303 24 Roskam, J. C. & Brakefield, P. M. Seasonal polyphenism in *Bicyclus* (Lepidoptera: Satyridae)  
304 butterflies: different climates need different cues. *Biological Journal of the Linnean Society* **66**,  
305 345-356, doi:10.1111/j.1095-8312.1999.tb01895.x (1999).
- 306 25 van Bergen, E. *et al.* Conserved patterns of integrated developmental plasticity in a group of  
307 polyphenic tropical butterflies. *BMC Evolutionary Biology* **17**, 59, doi:10.1186/s12862-017-  
308 0907-1 (2017).
- 309 26 Monteiro AF, Brakefield PM & V, F. The Evolutionary Genetics and Developmental Basis  
310 of Wing Pattern Variation in the butterfly *Bicyclus anynana*. *Evolution* **48**, 1147-1157, doi:doi:  
311 10.1111/j.1558-5646.1994.tb05301.x.
- 312 27 Koch, P. B., Merk, R., Reinhardt, R. & Weber, P. Localization of ecdysone receptor protein  
313 during colour pattern formation in wings of the butterfly *Precis coenia* (Lepidoptera:  
314 Nymphalidae) and co-expression with Distal-less protein. *Dev Genes Evol* **212**, 571-584,  
315 doi:10.1007/s00427-002-0277-5 (2003).
- 316 28 Clarke, J. W. in *Diversity and Evolution of Butterfly Wing Patterns: An Integrative Approach* (eds  
317 Toshio Sekimura & H. Frederik Nijhout) 239-253 (Springer Singapore, 2017).
- 318 29 Oostra, V., Saastamoinen, M., Zwaan, B. J. & Wheat, C. W. Strong phenotypic plasticity  
319 limits potential for evolutionary responses to climate change. *Nature communications* **9**, 1005,  
320 doi:10.1038/s41467-018-03384-9 (2018).



- 321 30 Wahlberg, N. *et al.* Nymphalid butterflies diversify following near demise at the  
322 Cretaceous/Tertiary boundary. *Proceedings of the Royal Society B: Biological Sciences* **276**, 4295  
323 (2009).
- 324 31 Oliver, J. C. Microevolutionary processes generate phylogenomic discordance at ancient  
325 divergences *Evolution* **67**, 1823-1830, doi:10.1111/evo.12047 (2013).  
326

## 327 **Supplementary Information**

### 328 **Materials and methods**

329

330 **Butterfly husbandry.** *B. anynana* were raised from lab populations in Singapore,  
331 under temperature control chambers at 17°C and 27°C, with a 12h light: dark cycle  
332 and 80% RH. *Vanessa cardui*, and *Morpho peleides* were reared in climate chambers at  
333 Yale University, New Haven at 17°C and 27°C. *Junonia coenia* was reared at 20° and  
334 30°C at 16H:8H light: dark cycle at Duke University. All other species of butterflies  
335 were reared at Entopia (formerly, Penang Butterfly Farm, Penang, Malaysia) in  
336 temperature controlled chambers (PT2499 Incubator, Exoreptiles, Malaysia) at 20°C  
337 and 30°C. 70% RH was maintained and monitored using (PT2470 Hygrometer,  
338 Exoreptiles, Malaysia) and EL-USB-2 data loggers (Lascar Electronics, PA 16505,  
339 USA).

340 Four hours after emergence, butterflies were captured and frozen in glassine  
341 envelopes at -20°C. All larvae in this experiment were sexed during larval or pupal  
342 stages and only females were used for analysis. Wings were carefully dissected and  
343 imaged using a Leica upright microscope. Wing images were processed in ImageJ,  
344 where area and eyespot size were measured using selection tools.

345

346 **Haemolymph collection.** Previous studies in *B. anynana* have pointed to the  
347 wandering (Wr) stage as the critical temperature sensitive stage for determination of  
348 ventral hindwing eyespot size<sup>6</sup>. Time lapse photographs of larval development were  
349 captured using a RICOH camera to determine the beginning of the Wr stage across all  
350 species. Initiation of Wr stage is marked by the larvae stopping to feed, purging their  
351 gut, and starting to wander away from the food and looking for a place to pupate.  
352 Using Hamilton syringes, 20uL of haemolymph, were extracted from each larvae at  
353 ~70% development in Wr stage (15h after Wr started for animals reared at 30°C, and

354 25h for animals reared at 20°C). Extracted haemolymph was then dissolved in freshly  
355 prepared 90ul methanol + 90 ul isooctane and stored at -20°C until hormone  
356 extraction<sup>7</sup>.

357  
358 **Wing tissue collection.** Larval wing discs were dissected from Wr stage larvae and  
359 stored in fix buffer until further processing at 4°C. These were later stained for EcR  
360 expression using a primary antibody 15F1 (DSHB) raised against a *Manduca sexta* EcR  
361 peptide shared across all isoforms of EcR, and secondary antibody AlexaFlour 488  
362 green. Spalt, a nuclear marker for spots and eyespots, was used as a location marker  
363 for putative eyespots/spots in the larval wings. Serial optical sections of the Cu1  
364 eyespot wing sector were imaged using LSM510 Meta, to distinguish between dorsal  
365 and ventral surfaces. Specific slices were obtained from raw images using Imaris v8.64  
366 (ImarisXT, Bitplane AG, software available at <http://bitplane.com>. *Junonia coenia* EcR  
367 data were taken from Koch and Nijhout, 2003<sup>27</sup>.

368  
369 **20E and antagonist injections.** Four species of butterflies, *Idea leuconoe*, *Vindula*  
370 *dejone*, *Doleschallia bisaltide*, and *B. anynana*, were injected with 20E or CucB during the  
371 Wr stage. Injections were made at ~50% development of Wr stage (12-14h at 30°C,  
372 18-22h at 20°C; For *B.anynana*, rearing were done at 27°C and 17°C respectively).  
373 Average body weights of wandering larvae and total haemolymph present were  
374 calculated for each species, and used to calculate naturally circulating 20E levels *in vivo*.  
375 A gradient of different concentrations of 20E and CucB were used for pilot  
376 experiments. Maximum concentrations of 20E, which did not surpass the natural  
377 levels, and of CucB, which did not cause mortality or pupation defects, were used for  
378 injections and are summarized in the table below. 20E and CucB were dissolved in  
379 10% EtOH to make working solution for injections. Equal volume injections of  
380 Vehicle (10% EtOH in Saline) injections were done as controls. After injections,

381 animals were reared at their regular rearing temperature (17°C for *B.anynana*, 20°C for  
382 other 20E injected animals and 27°C for *B.anynana*, 30°C for CucB injected animals)  
383 until emergence as adults. After emergence, the wings were dissected, imaged, and  
384 scored for further analysis.

385

386 **Statistical analysis.** All wing and eyespot data were log<sub>10</sub> transformed to ensure  
387 linearity of wing size with eyespot size for purposes of allometric scaling and  
388 regression analysis, and to be able to compare slopes across species with different  
389 eyespot sizes and wing sizes. Univariate ANCOVAs were performed using hindwing  
390 Cu1 eyespot area as the main variable, hindwing area as a covariate, and rearing  
391 temperature as a fixed factor in SPSS v21. Graphs were plotted in Microsoft Office  
392 2016 for Mac. Slopes for plasticity of eyespot size and 20E titers were measured using  
393 the expression: |

394

$$395 \quad \text{Slope} = \frac{(\text{Value at high temperature} - \text{Value at low temperature})}{\text{Difference} \square \text{rearing temperature (10}^\circ\text{C)}}$$

396

397 Using reverse transformed data for eyespot size, and untreated values for hormone  
398 titers.

399

400

401

402

403

404 **Table S1: Species reared for comparative morphometrics, gene expression and**  
 405 **hormonal measurements**

| Species                       | Family/Nymphalid Subfamily           | Spots/Eyespots | Rearing temp. (°C) | Source of animals used in experiments | Climatic conditions (Köppen classification)         | Reported Seasonality in Spot/Eyespot Size |
|-------------------------------|--------------------------------------|----------------|--------------------|---------------------------------------|-----------------------------------------------------|-------------------------------------------|
| <i>Junonia atlites</i>        | <b>Nymphalidae</b> /Nymphalinae      | Eyespots       | 20/30              | Malaysia                              | Tropical; Equatorial humid (Af)                     | No                                        |
| <i>Junonia coenia</i>         | <b>Nymphalidae</b> /Nymphalinae      | Eyespots       | 20/30              | USA                                   | Subtropical                                         | No                                        |
| <i>Junonia iphita</i>         | <b>Nymphalidae</b> /Nymphalinae      | Eyespots       | 20/30              | Malaysia                              | Tropical; Equatorial humid (Af)                     | No                                        |
| <i>Junonia almana</i>         | <b>Nymphalidae</b> /Nymphalinae      | Eyespots       | 20/30              | Malaysia                              | Tropical; Equatorial humid (Af)                     | Yes                                       |
| <i>Doleschallia bisaltide</i> | <b>Nymphalidae</b> /Nymphalinae      | Eyespots       | 20/30              | Malaysia                              | Tropical; Equatorial humid (Af)                     | No                                        |
| <i>Vanessa cardui</i>         | <b>Nymphalidae</b> /Nymphalinae      | Eyespots       | 17/27              | USA                                   | Subtropical                                         | No                                        |
| <i>Vindula dejone</i>         | <b>Nymphalidae</b> /Heliconinae      | Eyespots       | 20/30              | Malaysia                              | Tropical; Equatorial humid (Af)                     | No                                        |
| <i>Cethosia cynae</i>         | <b>Nymphalidae</b> /Heliconinae      | Eyespots       | 20/30              | Singapore, Malaysia                   | Tropical; Equatorial humid (Af)                     | No                                        |
| <i>Bicyclus anynana</i>       | <b>Nymphalidae</b> /Satyrinae        | Eyespots       | 17/27              | Africa                                | Tropical; Equatorial, winter dry (Aw)               | Yes                                       |
| <i>Morpho peleides</i>        | <b>Nymphalidae</b> /Morphinae        | Eyespots       | 17/27              | Costa Rica                            | Subtropical                                         | No                                        |
| <i>Danaus chrysippus</i>      | <b>Nymphalidae</b> / <b>Danainae</b> | Spots          | 20/30              | Malaysia                              | Tropical; Equatorial humid (Af)                     | No                                        |
| <i>Idea leuconoe</i>          | <b>Nymphalidae</b> / <b>Danainae</b> | Spots          | 20/30              | Taiwan                                | Subtropical; Warm, humid, hot summers <sup>30</sup> | No                                        |
| <i>Papilio polytes</i>        | <b>Papilionidae - Outgroup</b>       | Spots          | 20/30              | Malaysia                              | Tropical; Equatorial humid (Af)                     | No                                        |

406

407

408 **Table S2 : F statistics, p-values from analysis of covariance for differences in**  
 409 **Cu1 eyespot size between rearing temperatures (fixed factor) and assigned**  
 410 **character state for phylogenetic analysis.** Wing size was used as a covariate. Rows  
 411 highlighted in red indicate species where eyespot size decreases significantly with  
 412 rearing temperature (negative slope). Species highlighted in green shows the opposite  
 413 pattern (a significant positive slope). Character states of -1 = negative slope; 0=no  
 414 plasticity; 1=positive slope.

| Species                       | Family/<br>Subfamily | Factor | F stats | P value | DF (Factor,<br>Error) | Slope of<br>reaction norm | Character<br>state |
|-------------------------------|----------------------|--------|---------|---------|-----------------------|---------------------------|--------------------|
| <i>Papilio polytes</i>        | <b>Papilionidae</b>  | temp.  | 0.360   | 0.360   | 1,59                  | 0.000                     | 0                  |
| <i>Danaus chrysippus</i>      | <b>Danainae</b>      | temp.  | 0.318   | 0.585   | 1,59                  | 0.008                     | 0                  |
| <i>Idea leucone</i>           | <b>Danainae</b>      | temp.  | 10.073  | 0.031   | 1,59                  | -0.004                    | -1                 |
| <i>Cetbosia cyane</i>         | Heliconinae          | temp.  | 0       | 0.096   | 1,59                  | -0.004                    | 0                  |
| <i>Vindula dejone</i>         | Heliconinae          | temp.  | 8.247   | 0.009   | 1,59                  | -0.032                    | -1                 |
| <i>Vanessa cardui</i>         | Nymphalinae          | temp.  | 15.056  | 0.001   | 1,59                  | -0.016                    | -1                 |
| <i>Junonia almana</i>         | Nymphalinae          | temp.  | 15.832  | <0.001  | 1,59                  | -0.010                    | -1                 |
| <i>Junonia coenia</i>         | Nymphalinae          | temp.  | 0.888   | 0.352   | 1,59                  | 0.003                     | 0                  |
| <i>Junonia atlites</i>        | Nymphalinae          | temp.  | 4.683   | 0.011   | 1,59                  | -0.002                    | -1                 |
| <i>Junonia iphita</i>         | Nymphalinae          | temp.  | 11.670  | 0.042   | 1,59                  | -0.018                    | -1                 |
| <i>Doleschallia bisaltide</i> | Nymphalinae          | temp.  | 13.170  | 0.001   | 1,59                  | -0.005                    | -1                 |
| <i>Bicyclus anynana</i>       | Satyrinae            | temp.  | 42.769  | <0.001  | 1,59                  | 0.057                     | 1                  |
| <i>Morpho peleides</i>        | Morphinae            | temp.  | 0.765   | 0.393   | 1,19                  | -0.007                    | 0                  |

415

416

417 **Table S3 : F statistics, p-values from analysis of covariance for differences in**  
 418 **20E hormone titers between rearing temperatures (fixed factor) and assigned**  
 419 **character states for phylogenetic analysis.** Wing size was used as a covariate. All  
 420 data were log<sub>10</sub> transformed to ensure linear allometries and comparable variances  
 421 across temperature treatments. Rows highlighted in green indicate species where 20E  
 422 titers increase significantly with rearing temperature (positive slope). Character state of  
 423 0=no plasticity; 1=positive slope.  
 424

| Species                       | Factor      | F stats | Slope of reaction norm | P value | DF (Factor, Error) | Character state |
|-------------------------------|-------------|---------|------------------------|---------|--------------------|-----------------|
| <i>Papilio polytes</i>        | Temperature | 0.004   | 126.087                | <0.0001 | 1,10               | 1               |
| <i>Danaus chrysippus</i>      | Temperature | 1.234   | 12.424                 | 0.293   | 1,10               | 0               |
| <i>Idea leucone</i>           | Temperature | 0.000   | 176.991                | <0.0001 | 1,17               | 1               |
| <i>Cetbosia cyane</i>         | Temperature | 0.000   | 45.831                 | 0.248   | 1,15               | 0               |
| <i>Vindula dejone</i>         | Temperature | 10.199  | 289.120                | 0.005   | 1,17               | 1               |
| <i>Junonia almana</i>         | Temperature | 5.830   | 24.134                 | 0.034   | 1,25               | 1               |
| <i>Junonia atlites</i>        | Temperature | 46.370  | 547.639                | <0.0001 | 1,11               | 1               |
| <i>Junonia iphita</i>         | Temperature | 1.537   | 112.302                | 0.255   | 1,9                | 0               |
| <i>Doleschallia bisaltide</i> | Temperature | 31.481  | 192.753                | <0.0001 | 1,10               | 1               |
| <i>Bicyclus anynana</i>       | Temperature | 34.304  | 185.891                | <0.0001 | 1,59               | 1               |

425  
 426 **Table 4 Mean body weight of wandering larvae, haemolymph volume and**  
 427 **natural 20E titers at two different rearing temperatures; 20E and CucB**  
 428 **injection volume. (N=5 for measurement of means)**

| Species               | Mean body weight | Mean total haemolymph volume | Total 20E (in pg) |        | 20E injection |                       |               | CucB injection |                       |               |
|-----------------------|------------------|------------------------------|-------------------|--------|---------------|-----------------------|---------------|----------------|-----------------------|---------------|
|                       |                  |                              | 20°C              | 30°C   | Volume        | Concentration (pg/μL) | Total (in pg) | Volume         | Concentration (pg/μL) | Total (in pg) |
| <i>Idea leuconoe</i>  | 0.63g            | 142 uL                       | 497500            | 709890 | 4 μl          | 20000                 | 80,000        | 3 μl           | 20000                 | 60000         |
| <i>Vindula dejone</i> | 0.45g            | 88 uL                        | 191079            | 445505 | 3 μl          | 10000                 | 30000         | 3 μl           | 10000                 | 30000         |
| <i>D. bisaltide</i>   | 0.49g            | 95 uL                        | 170026            | 353142 | 3 μl          | 7000                  | 21000         | 3 μl           | 10000                 | 30000         |
| <i>B. anynana</i>     | 0.19g            | 61 uL                        | 85104             | 144165 | 3 μl          | 2000                  | 6000          | 2 μl           | 5600                  | 10,200        |

429



430  
431  
432  
433  
434  
435  
436  
437  
438  
439  
440  
441

**Phylogenetic analysis.** Patterns of plasticity in eyespot size were categorised in distinct groups based on positive, negative, or slopes undistinguishable from zero when eyespot size was plotted against temperature. Using a pruned version of a larger phylogenetic tree for all nymphalid genera<sup>30,31</sup>, ancestral trait reconstructions were performed and evolution of the reaction norm slopes were mapped using maximum parsimony in Mesquite. Similar analyses were performed using data obtained for hormone titer plasticity where species were categorised into two categories – those with a positive slope or a zero slope, and data for presence or absence of EcR expression, and 20E-EcR signaling affecting eyespot size.

442 We also evaluated several hypotheses concerning the evolution of relevant traits with likelihood ratio tests (LRT) and Akaike Information Criteria (AIC). For all analyses, specific ancestral nodes of interest were "fixed" for a particular state and the resultant maximum likelihood score was used for LRT and AIC comparisons<sup>18</sup>. We performed four tests in all, investigating (1) whether the most recent common ancestor (MRCA) to all butterflies (node 14 in Fig. S1) had plasticity in spot and eyespot size or not; (2) whether the MRCA to all butterfly species with eyespots (node 17) had plasticity in eyespot size or not; (3) whether the MRCA to all butterflies (node 14) had positive hormone titre plasticity or not; and (4) whether the MRCA to all butterfly species with eyespots (node 17) expressed EcR in the locations of future spots / eyespots or not. For tests of eyespot size plasticity, we used a three-state coding scheme: positive size plasticity, negative size plasticity, and no plasticity. Character states were scored based on the sign of the slope of the reaction norm; species with reaction norms that were not significantly different from zero were scored as having no temperature-dependent plasticity in eyespot size (Table S2). Tests on positive hormone titre plasticity and EcR expression used characters coded as binary states. For AIC comparisons, we used the correction for small sample sizes (AICc) and evaluated models based on the AICc

459 weight,  $w_i = e^{((\min(\text{AICc}) - \text{AICc}_i)/2)}$ . Models were considered significantly different if they  
 460 differed by 2 or more log-likelihood units or the AICc weight was less than 0.2.

461  
 462 For all comparisons, there was little significant support for one hypothesis over  
 463 another (Table S5). In tests on the origin of eyespot size plasticity, both the MRCA to  
 464 all butterflies and the MRCA to all butterflies with eyespots had slightly better  
 465 likelihood and AICc scores for being non-plastic than being plastic. Positive hormone  
 466 titre plasticity in the MRCA to all butterflies had more support than a non-plastic  
 467 MRCA, although the difference in likelihoods and AICc was not significant. Finally,  
 468 the absence of EcR expression in the MRCA of all eyespot-bearing butterflies had  
 469 higher likelihood and AICc scores than a model in which the MRCA did express EcR  
 470 in future spot / eyespot centers. The absence of significant support for one model  
 471 over another is largely due to the low number of species examined.

472

473 **Table S5. Results of likelihood ratio tests and AIC comparisons.** See Fig. S1 for  
 474 node identities.

| Character        | Node | State               | -lnL   | $\Delta\ln L$ | AICc   | $w_i$ |
|------------------|------|---------------------|--------|---------------|--------|-------|
| Size plasticity  | 14   | Negative slope      | 14.291 | 0             | 30.917 | 1.0   |
|                  |      | Flat slope          | 14.559 | 0.267         | 31.450 | 0.766 |
|                  |      | Positive slope      | 15.084 | 0.792         | 32.501 | 0.453 |
|                  | 18   | Negative slope      | 14.195 | 0             | 30.724 | 1.0   |
|                  |      | Flat slope          | 14.948 | 0.453         | 31.630 | 0.636 |
|                  |      | Positive slope      | 15.120 | 0.925         | 32.574 | 0.397 |
| 20 Hormone titre | 14   | Positive plasticity | 7.285  | 0             | 19.661 | 1.0   |
|                  |      | No plasticity       | 7.716  | 0.431         | 20.523 | 0.650 |
| EcR expression   | 18   | EcR absent          | 9.112  | 0             | 20.558 | 1.0   |
|                  |      | EcR present         | 9.604  | 0.491         | 21.571 | 0.612 |

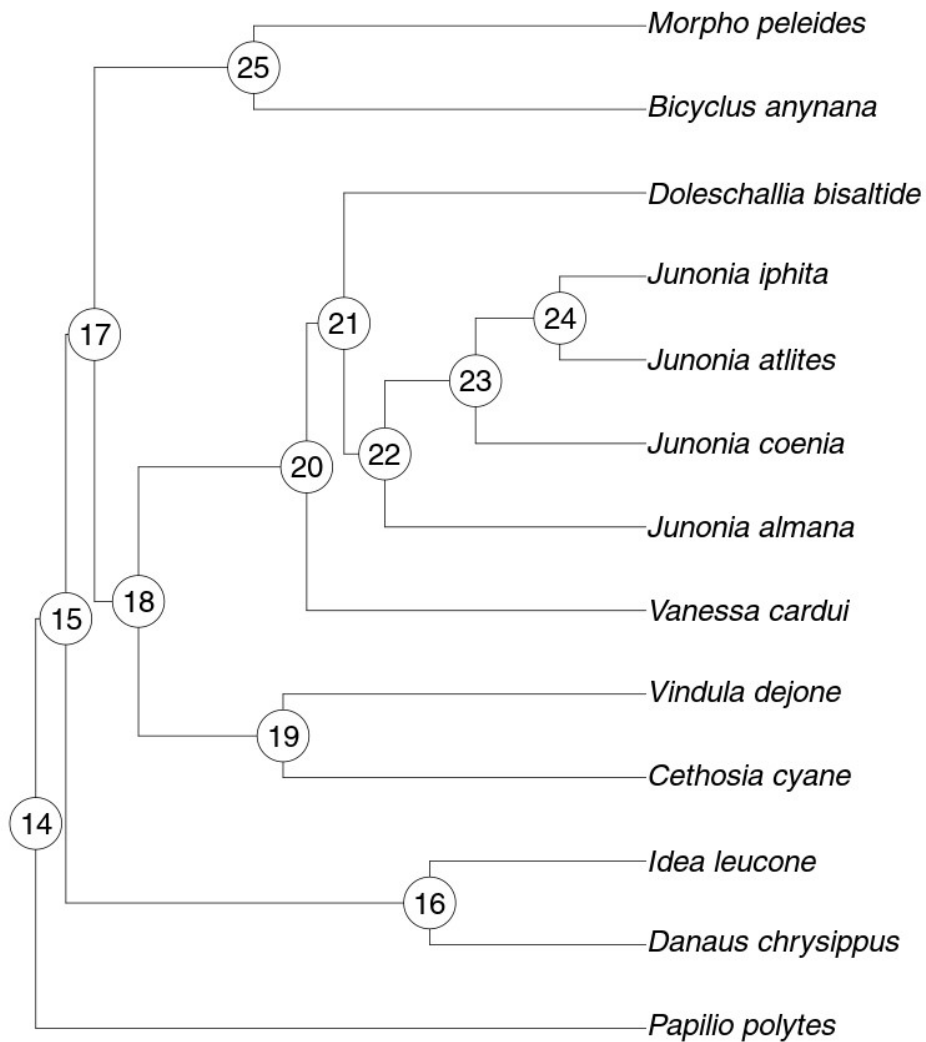

475 Fig. S1 **Tree used for ancestral state hypotheses tests.** See text for explanation of

476 node numbers.

477

478

479

480

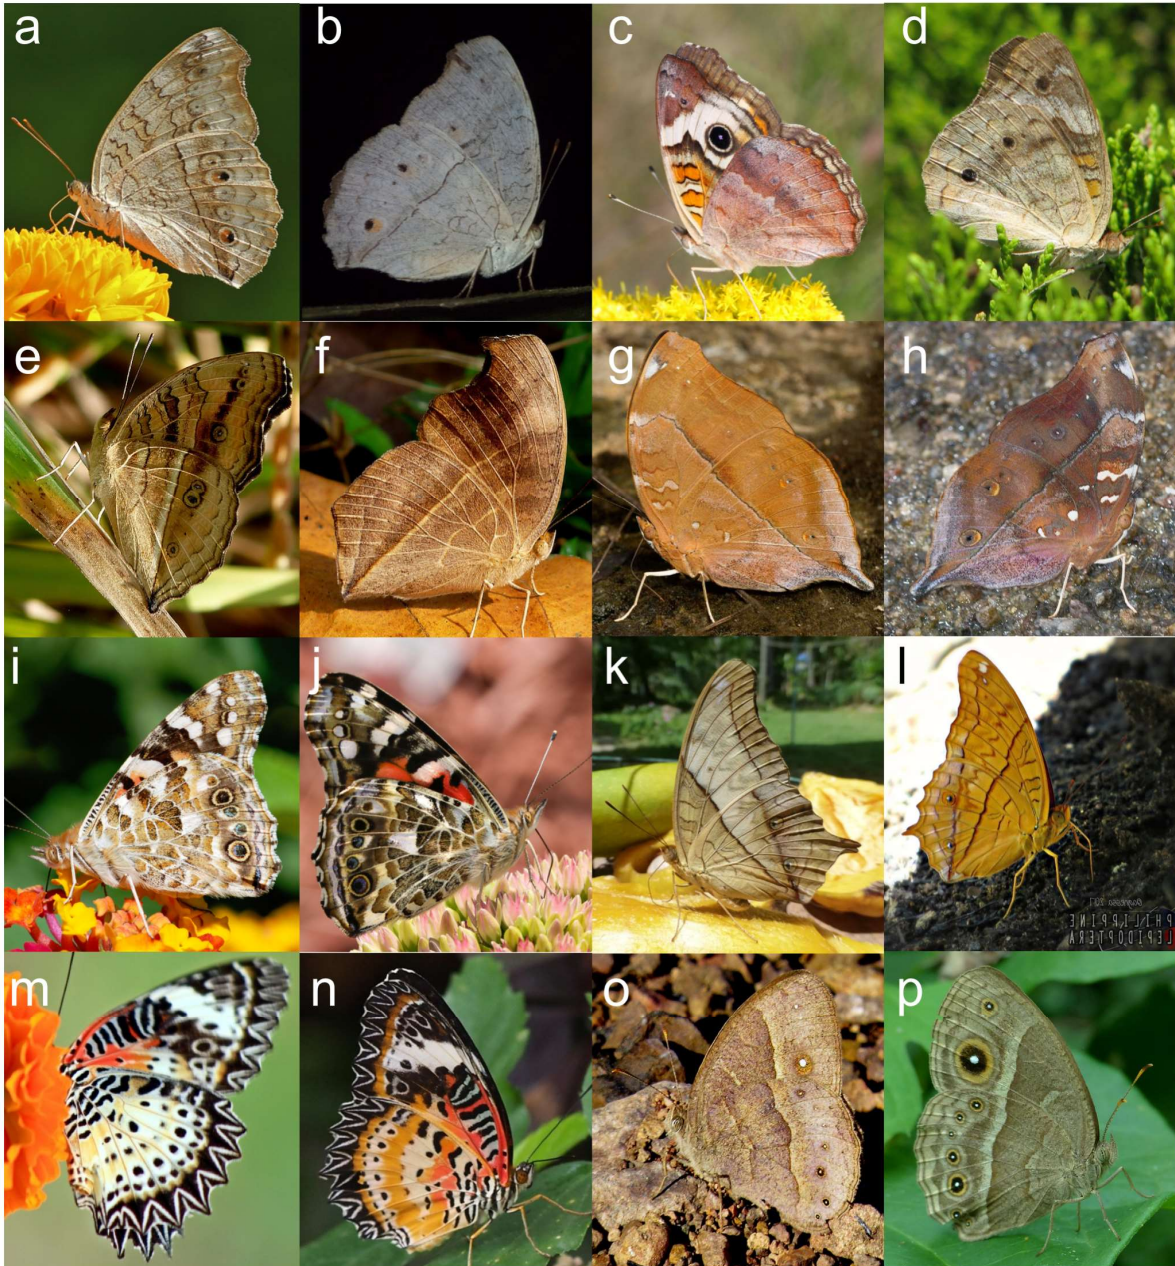

481

482 **Fig. S2 Phenotypic plasticity in wing patterns is observed across a wide variety**  
483 **of species in wild.** a,b- Wet and Dry season forms of *Junonia atlites*; c,d- Seasonal  
484 forms of *Junonia coenia*; e,f- Seasonal forms in *Junonia almana*; g,h- Differences in wing  
485 patterns across seasons in *Doleschalia bisaltide*; i,j- *Vanessa cardui* produces exquisite  
486 seasonal phenotypes; k,l- Seasonal variations in *Vindula dejone*; m,n- Seasonal forms in  
487 *Cethosia cynae*; o,p – Dry and Wet seasonal forms of *Bicyclus anynana*. Pictures are  
488 collected from crowdsourced repositories and copyrights belong to respective owners.  
489 Seasonal forms have been associated with reported time of collection.



490 **Acknowledgements**

491 This work was supported by Singapore Ministry of Education award MOE2014-T2-  
492 1-146 to A.M. We thank Ms. Mei Lee Wong, Mr. Andy Loke and Mr. BT Chin  
493 (Penang Butterfly farm, Malaysia) for their support and supplies of butterflies used in  
494 these experiments. Work at SLING (M.R.W.) is supported by grants from the  
495 National University of Singapore via the Life Sciences Institute (LSI), the National  
496 Research Foundation (NRFI2015-05), and a BMRC-SERC joint grant (BMRC-  
497 SERC 112 148 0006) from the Agency for Science, Technology and Research  
498 (A\*Star). We acknowledge Anne K Bendt for excellent SLING scientific program  
499 management and operations support. The EcR 10F1-s developed by Riddiford, L.M.  
500 was obtained from the Developmental Studies Hybridoma Bank, created by the  
501 NICHD of the NIH and maintained at The University of Iowa, Department of  
502 Biology, Iowa City, IA 52242.

503

504 **Author Contributions:**

505 Conceptualization : AM, SB

506 Methodology : SB, AM, MRW, JCO

507 Investigation : SB, LSHJ, FN

508 Formal analysis : SB, LSHJ, JCO, AM

509 Supervision, Funding Acquisition : AM

510 Writing – Original Draft Preparation : SB

511 Writing – Review and Editing: AM

512

513 **Competing interests**

514 The author(s) declare no competing interests.

515
